# Supplementary material for: Open and Calm – A randomized controlled trial evaluating a public stress reduction program in Denmark
Source: PubMed Central journal article supplement (PMC4682248; doi:10.1186/s12889-015-2588-2), 2015-12-16
Supplement: 12889_2015_2588_MOESM2_ESM.pdf [file 12889_2015_2588_MOESM2_ESM.pdf]

## Supplementary panel 1. Comparisons of interventional formats on self-report and visual perception

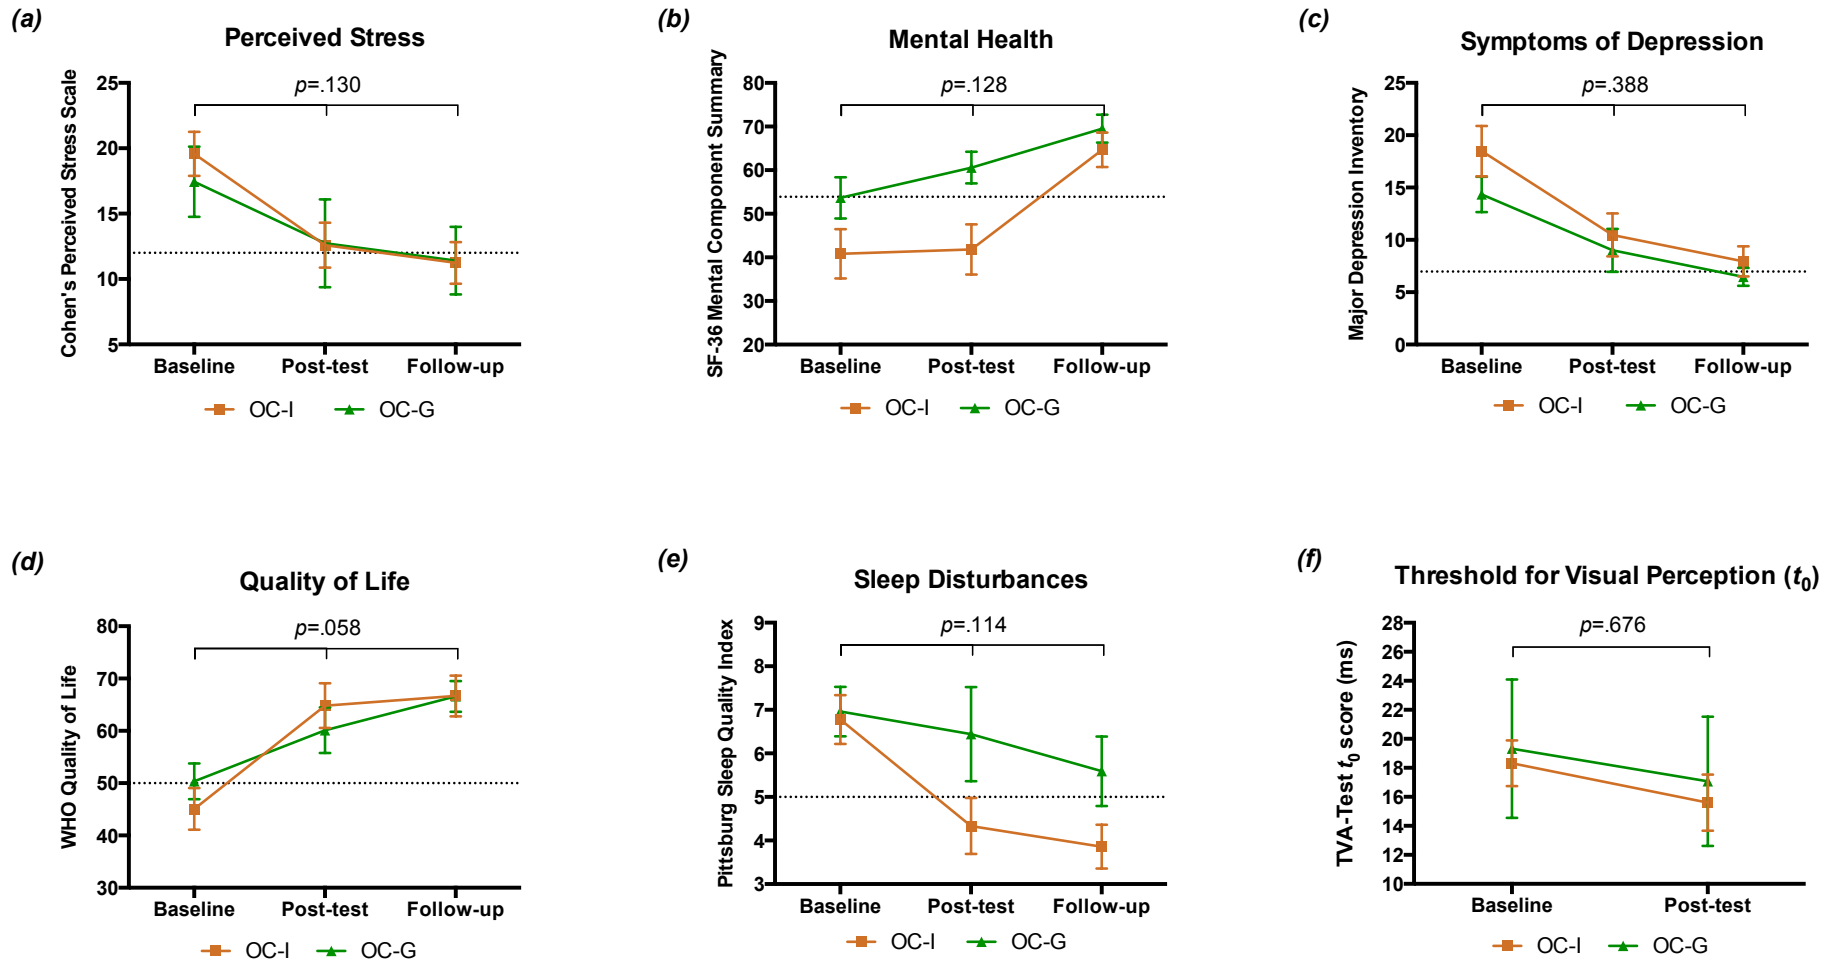

Notes. \*. $p < .05$ . \*\*. $p < .01$ . \*\*\*. $p < .001$ .  $p$ -values are two-tailed, corrected for multiple tests (Bonferroni-Holm), and based on intent-to-treat-analyses (Open and Calm [OC]  $N=48$ . Treatment As Usual [TAU]  $N=24$ ) after adjustment for relevant biological, socioeconomic, and psychological trait variables. Asterisks (\*) above horizontal lines represent  $p$ -values of Time\*Group effects, while asterisks or  $p$ -values above error bars represent  $p$ -values of between-group comparisons (Table 2). Error bars represent 95% CI of the mean. **(a)** The dotted line represent the mean among a national region-stratified random sample of >21.000 Danish adults (Stigsdotter et al., 2010). **(b)** The dotted line represents the age-adjusted Danish norm for the SF36-Mental Health Component (Bj rmer et al., 1997) **(c)** The dotted line represents the Danish norm (Olsen et al., 2004). **(d)** Scores below the dotted line represent a risk marker for depression (Folker & Folker, 2008). **(e)** Scores above the dotted line represent a risk marker for depression (Buysse et al., 1989). As seen, OC-I shows descriptively (but not significantly) larger improvement on sleep disturbances than OC-G. **(f)** Changes in the threshold for visual perception,  $t_0$ .
