# Supplementary material for: Open and Calm – A randomized controlled trial evaluating a public stress reduction program in Denmark
Source: PubMed Central journal article supplement (PMC4682248; doi:10.1186/s12889-015-2588-2), 2015-12-16
Supplement: 12889_2015_2588_MOESM5_ESM.pdf [file 12889_2015_2588_MOESM5_ESM.pdf]

# Supplementary Panel 2. Open and Calm participants' changes in cortisol secretion dynamics

**(a) Curve of Cortisol Secretion (AUC<sub>I</sub>)**

Non-blunted OC participants

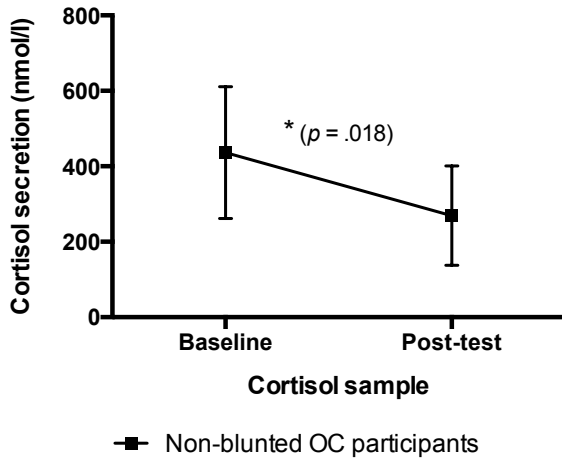

**(b) Curve of Cortisol Secretion (AUC<sub>I</sub>)**

Blunted OC participants

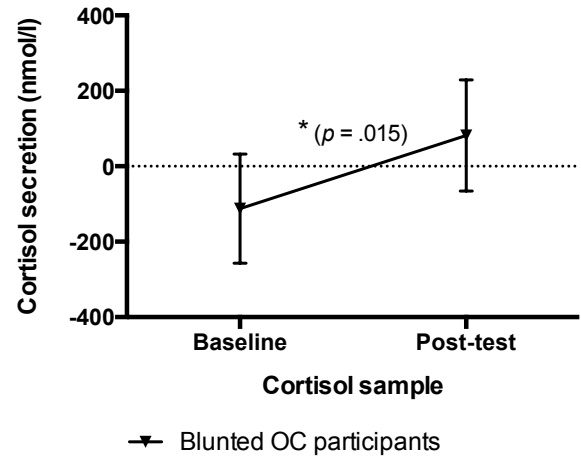

**(c) Curve of Cortisol Secretion (AUC<sub>I</sub>)**

Non-blunted OC participants

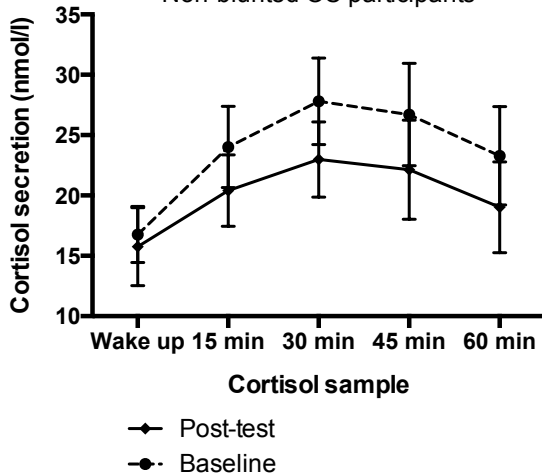

**(d) Curve of Cortisol Secretion (AUC<sub>I</sub>)**

Blunted OC participants

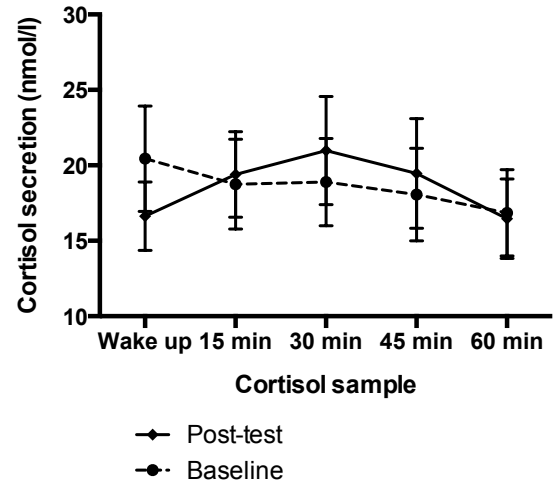

Notes. \* $p < .05$  (two-tailed, intent-to-treat analyses). **(a)** Pre-post changes in the Cortisol Awakening Response (CAR) Area Under Curve - Increase (AUC<sub>I</sub>) for non-blunted OC participants ( $n=15$ ). **(b)** Pre-post changes in AUC<sub>I</sub> for blunted OC participants ( $n=18$ ). **(c)** Descriptive plot of baseline and post-test values for saliva samples 1-5 for non-blunted OC participants. **(d)** Descriptive plot of baseline and post-test values for saliva samples 1-5 for blunted OC participants. Error bars represent 95% CI of the mean. Supplementary Table 2 shows descriptive cortisol data and test statistics.
